# Supplementary material for: Beyond the lesion site: minocycline augments inflammation and anxiety-like behavior following SCI in rats through action on the gut microbiota
Source: PubMed Central journal article supplement (PMC8234629; doi:10.1186/s12974-021-02123-0), 2021-06-26
Supplement: 12974_2021_2123_MOESM2_ESM.pdf [file 12974_2021_2123_MOESM2_ESM.pdf]

|                                                          | 5DPI                    | 14DPI                 | 28DPI                   |
|----------------------------------------------------------|-------------------------|-----------------------|-------------------------|
| Uninjured vs. Uninjured+Mino                             | Leptin (p = 0.023)      | Melatonin (p = 0.049) |                         |
| Uninjured vs. SCI                                        |                         | Melatonin (p = 0.041) | IL-12 (p = 0.021)       |
|                                                          |                         |                       | Eotaxin (p = 0.041)     |
|                                                          |                         |                       | MIP-1a (p = 0.005)      |
|                                                          |                         |                       | IL-6 (p = 0.041)        |
|                                                          |                         |                       | IL-5 (p = 0.018)        |
|                                                          |                         |                       | MCP1 (p = 0.043)        |
|                                                          |                         |                       | VEGF (p = 0.044)        |
|                                                          |                         |                       | Fractalkine (p = 0.020) |
| Uninjured vs. SCI+Mino                                   | Leptin (p = 0.026)      | Leptin (p = 0.037)    | Melatonin (p = 0.026)   |
|                                                          |                         | Melatonin (p = 0.012) |                         |
| Uninjured+Mino vs. SCI                                   |                         |                       | LIX (p = 0.003)         |
|                                                          |                         |                       | IL-17a (p = 0.002)      |
|                                                          |                         |                       | IL-12 (p = 0.003)       |
|                                                          |                         |                       | GM-CSF (p = 0.003)      |
|                                                          |                         |                       | Eotaxin (p = 0.010)     |
|                                                          |                         |                       | TNFa (p = 0.005)        |
|                                                          |                         |                       | MIP-1a (p = 0.001)      |
|                                                          |                         |                       | IL-4 (p = 0.021)        |
|                                                          |                         |                       | IL-6 (p = 0.039)        |
|                                                          |                         |                       | IL-5 (p = 0.010)        |
|                                                          |                         |                       | IL-18 (p = 0.029)       |
|                                                          |                         |                       | MCP1 (p = 0.025)        |
|                                                          |                         |                       | Fractalkine (p = 0.017) |
| Uninjured+Mino vs. SCI+Mino                              |                         |                       |                         |
| SCI vs. SCI+Mino                                         |                         |                       | MCP-1 (p = 0.018)       |
|                                                          |                         |                       | Eotaxin (p = 0.005)     |
|                                                          |                         |                       | GM-CSF (p = 0.015)      |
|                                                          |                         |                       | MIP-1a (p = 0.034)      |
|                                                          |                         |                       | Fractalkine (p = 0.018) |
|                                                          |                         |                       | IL-6 (p = 0.014)        |
|                                                          |                         |                       | TNFa (p = 0.035)        |
| Colour represents which group is significantly increased |                         |                       |                         |
| Uninjured                                                | Uninjured + Minocycline | SCI                   | SCI + Minocycline       |
