# Supplementary material for: Beyond the lesion site: minocycline augments inflammation and anxiety-like behavior following SCI in rats through action on the gut microbiota
Source: PubMed Central journal article supplement (PMC8234629; doi:10.1186/s12974-021-02123-0), 2021-06-26
Supplement: 12974_2021_2123_MOESM3_ESM.pdf [file 12974_2021_2123_MOESM3_ESM.pdf]

# Species

BL

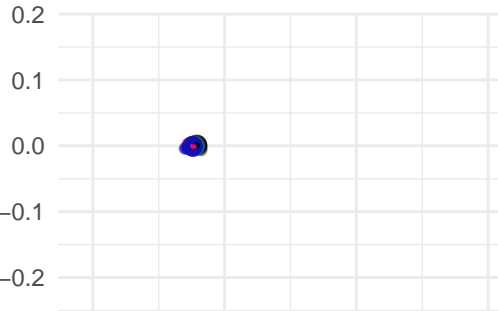

DOI

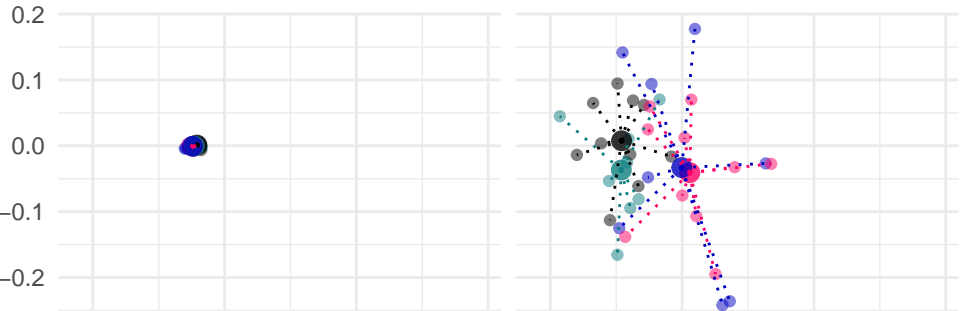

5DPI

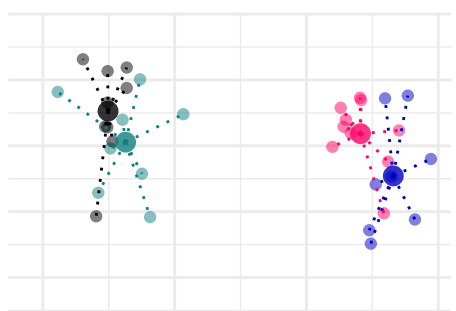

14DPI

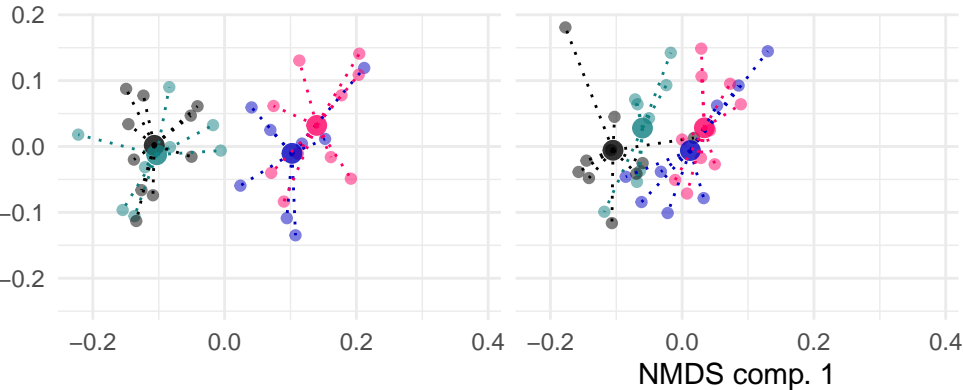

28DPI



● Uninjured ● Uninjured+Minocycline ● SCI ● SCI+Minocycline
