# Supplementary material for: Beyond the lesion site: minocycline augments inflammation and anxiety-like behavior following SCI in rats through action on the gut microbiota
Source: PubMed Central journal article supplement (PMC8234629; doi:10.1186/s12974-021-02123-0), 2021-06-26

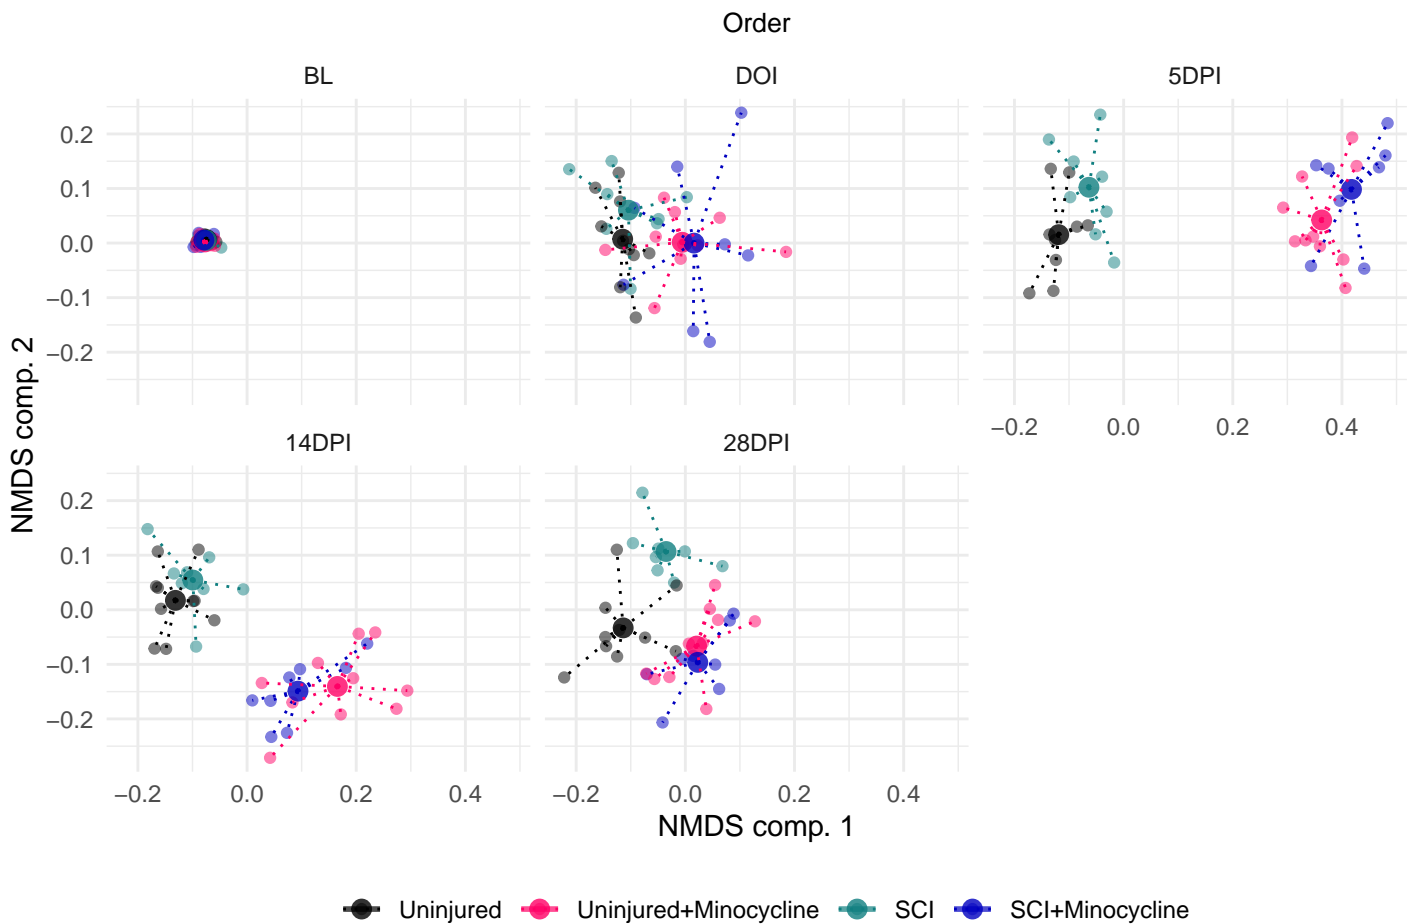

Supplement: 12974_2021_2123_MOESM7_ESM.pdf [file 12974_2021_2123_MOESM7_ESM.pdf]
